# Supplementary material for: Glomerular Endothelial Cell-Derived miR-200c Impairs Glomerular Homeostasis by Targeting Podocyte VEGF-A
Source: MDPI journal article supplement (doi:10.3390/ijms232315070), 2022-12-01
Supplement: s1 [file s1]

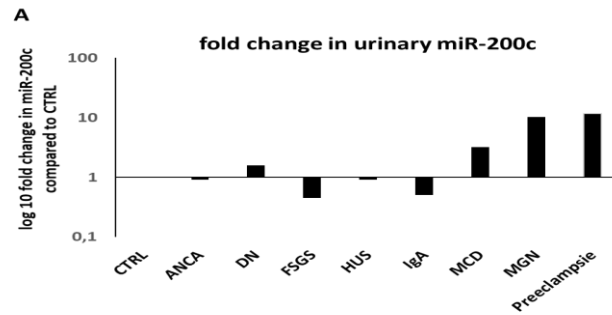

**Supplementary Figure S1.** Fold change in miR-200c expression in pooled urines from patients with different glomerular diseases. Expression is given as fold change compared to control urine. Urines were normalized to Cel-miR-9, which was spiked into the urines prior to RNA isolation.

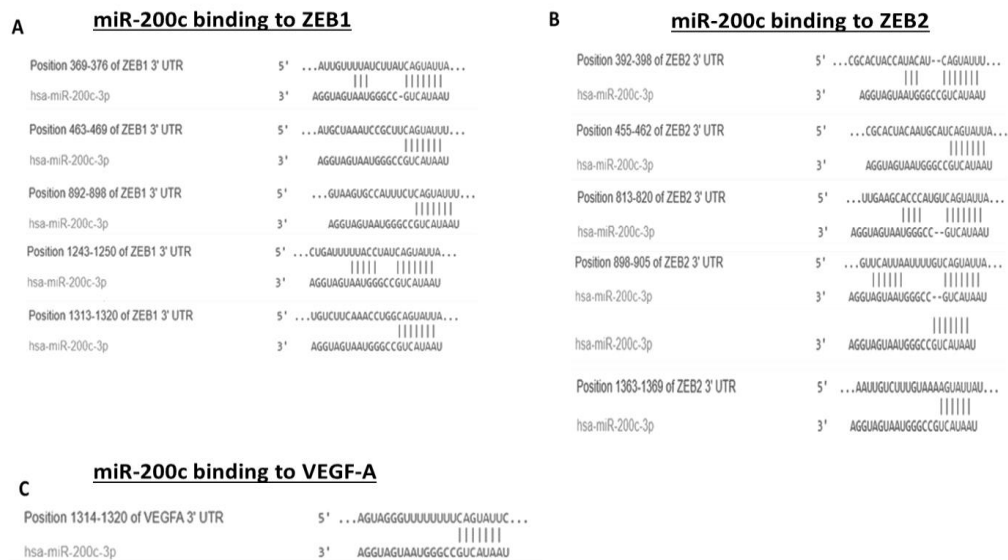

**Supplementary Figure S2.** Position and binding site of miR-200c to different 3'UTR regions. Position and binding site of miR-200c to ZEB1 (A), ZEB2 (B) and VEGF-A (C).
